# Supplementary material
Source: Royal Society of Chemistry journal article supplement (doi:10.1039/d5dt03004h)
Supplement: d5dt03004h1.pdf [file d5dt03004h1.pdf]

## Supplementary Information

### **Polyaniline and alkali cations co-intercalated V<sub>2</sub>O<sub>5</sub> composites with tremelliform nanosheet structure for high performance aqueous zinc-ion batteries**

Zhou Su<sup>a</sup>, Yishu Yang<sup>a</sup>, Mingshu Zhao<sup>a,\*</sup>, Min Li<sup>a</sup>, Lidong Jiao<sup>a</sup>, Feng Li<sup>a</sup>, Qingyi Ren<sup>a</sup>,  
Sen Yang<sup>a</sup>

<sup>a</sup> School of Physics, Key Laboratory of Shaanxi for Advanced Functional Materials and Mesoscopic Physics, MOE Key Laboratory for Nonequilibrium Synthesis and Modulation of Condensed Matter, Xi'an Jiaotong University, Xi'an 710049, Shaanxi, China.

\* Corresponding author. Mingshu Zhao

E-mail address: zhaomshu@mail.xjtu.edu.cn (M. Zhao).

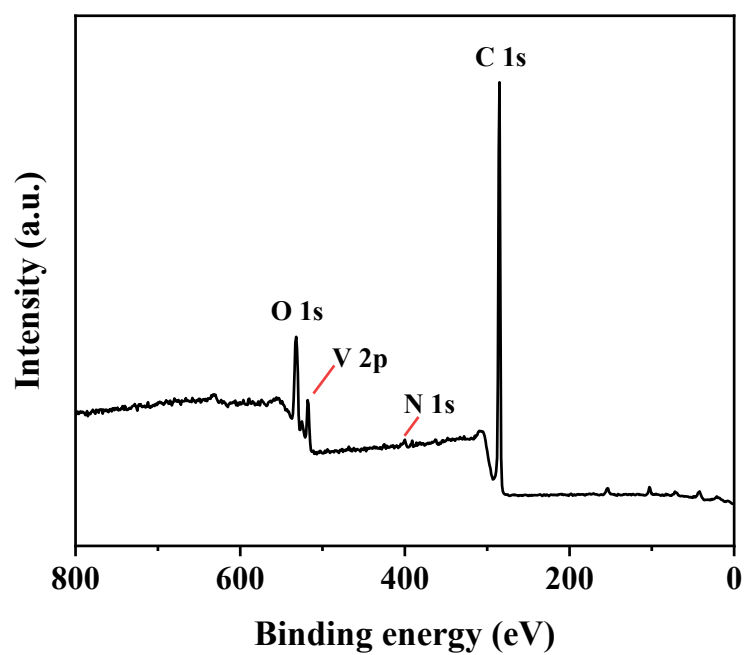

**Fig. S1.** The XPS survey spectrum of PVO-Li.

**Table S1.** The atomic percentage of each element obtained from the XPS results of PVO-Li.

| Element           | Li   | V    | O     | N    | C     |
|-------------------|------|------|-------|------|-------|
| Atomic percentage | 2.02 | 4.52 | 12.39 | 1.18 | 79.89 |

**Table S2.** Electronic conductivities of the five samples at room temperature.

| Sample | Electronic conductivity ( $\text{S cm}^{-1}$ ) |
|--------|------------------------------------------------|
| HVO    | $4.57 \times 10^{-4}$                          |
| PVO    | $3.05 \times 10^{-3}$                          |
| PVO-Li | $8.72 \times 10^{-3}$                          |
| PVO-Na | $8.91 \times 10^{-3}$                          |
| PVO-K  | $8.45 \times 10^{-3}$                          |

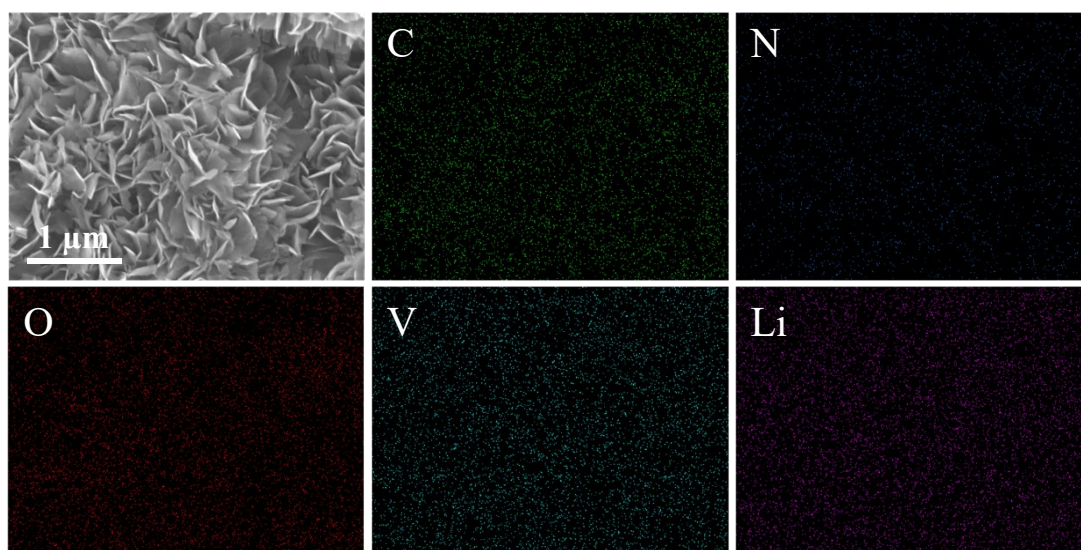

**Fig. S2.** SEM and EDS mapping images of PVO-Li.

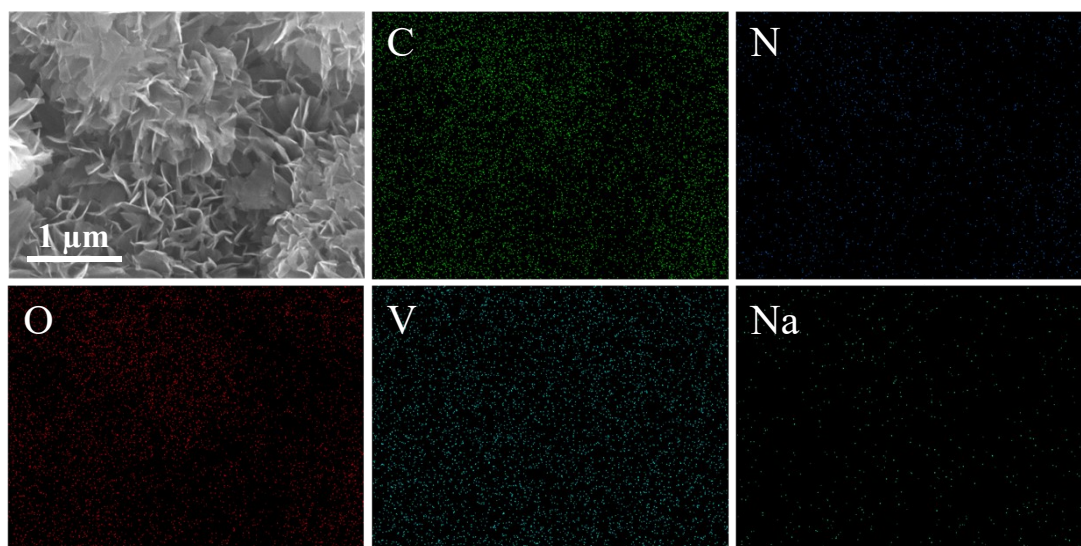

**Fig. S3.** SEM and EDS mapping images of PVO-Na.

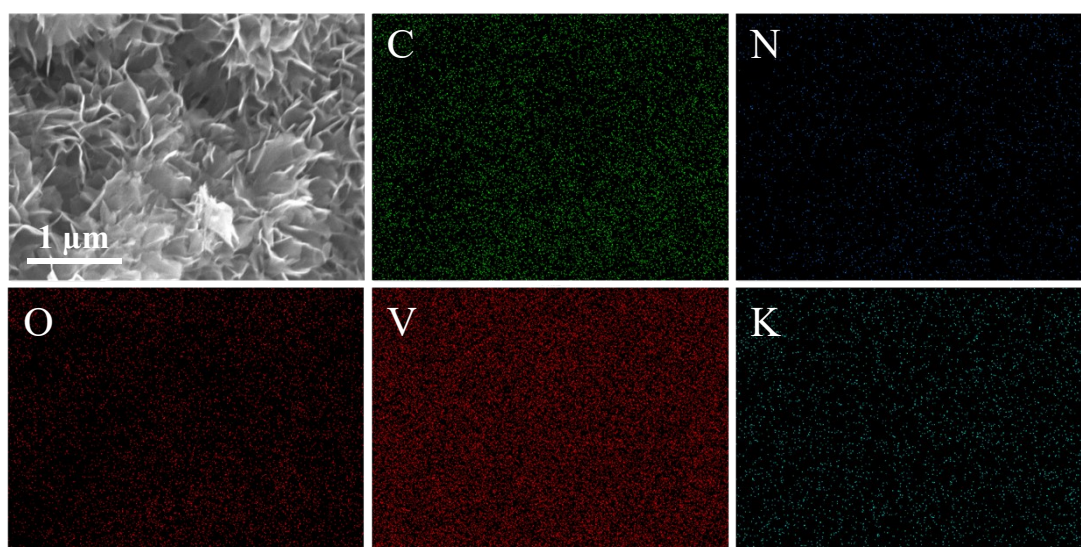

**Fig. S4.** SEM and EDS mapping images of PVO-K.

**Table S3.** The content of Li element in the electrolyte and the electrode after 500 cycles at  $1 \text{ A g}^{-1}$  tested by ICP-MS.

|             | Content of Li element ( $\mu\text{g}$ ) |
|-------------|-----------------------------------------|
| Electrolyte | 0.13                                    |
| Electrode   | 37.8                                    |

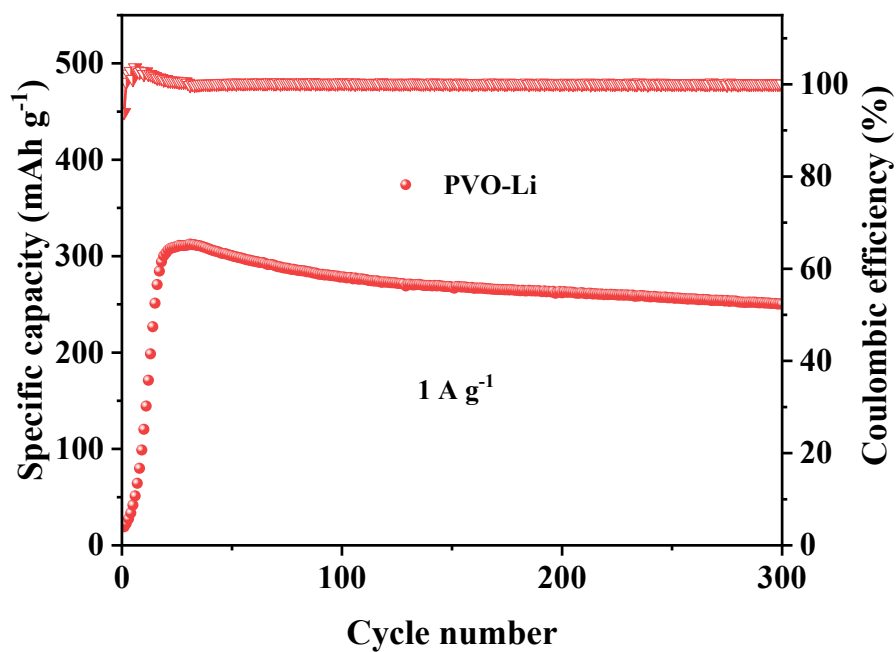

**Fig. S5.** Cycling performance of the PVO-Li electrode with a mass loading of  $6.3 \text{ mg cm}^{-2}$  at  $1 \text{ A g}^{-1}$ .

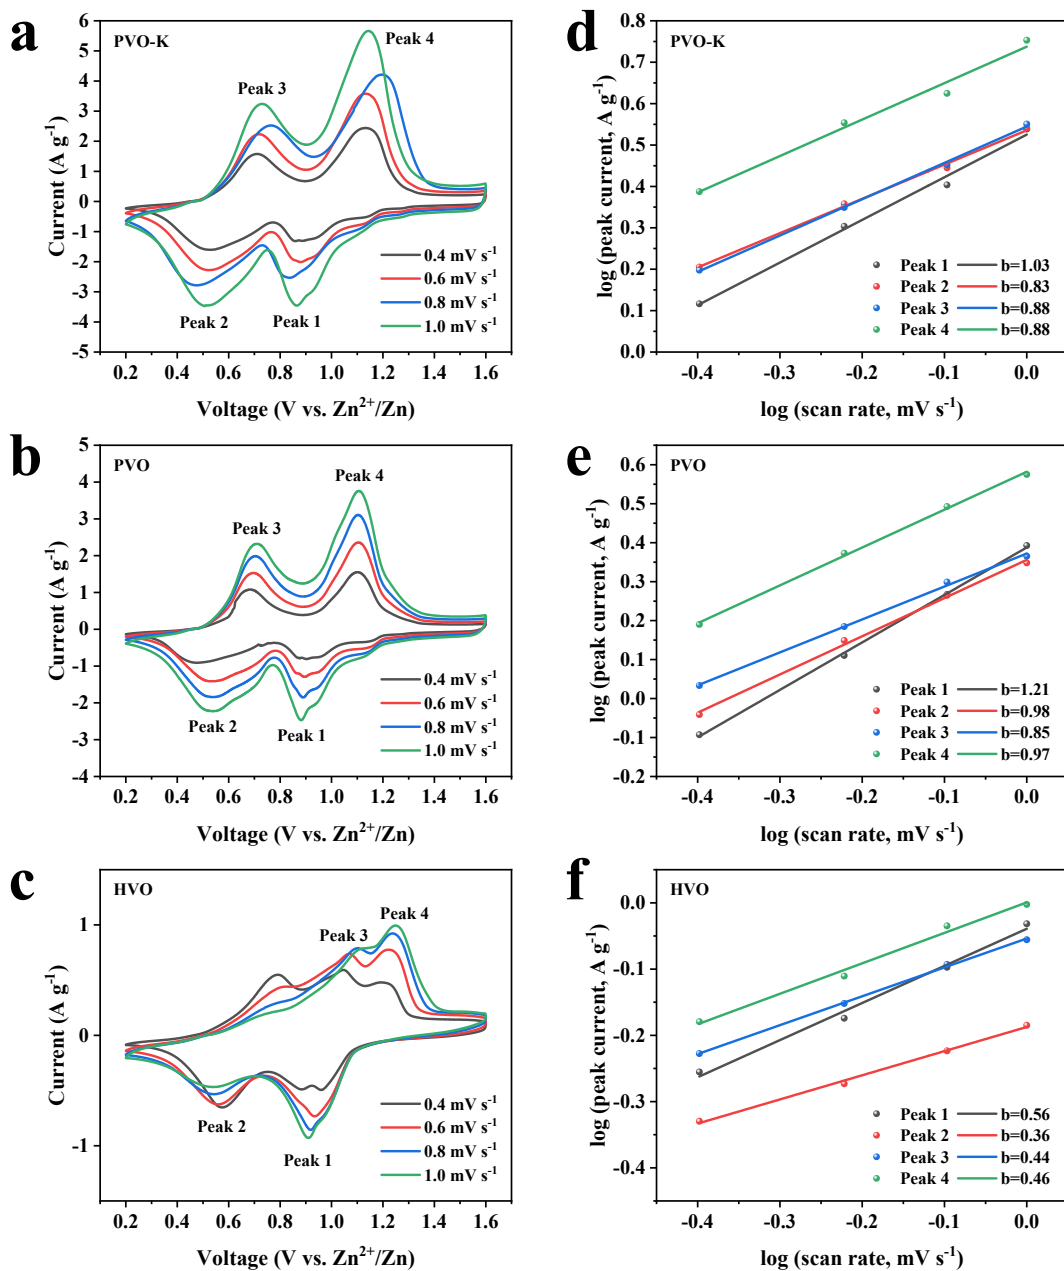

**Fig. S6.** CV curves of (a) PVO-K, (b) PVO and (c) HVO electrodes at scan rates increasing from 0.4 to 1.0  $\text{mV s}^{-1}$ .  $\log(\text{peak current})$  vs.  $\log(\text{scan rate})$  plots of peaks 1~4 in the CV curves for (d) PVO-K, (e) PVO and (f) HVO electrodes.

**Table S4.** Charge transfer resistances ( $R_{ct}$ ) of the five electrodes before and after cycling.

| Electrode | $R_{ct}$ ( $\Omega$ , before cycling) | $R_{ct}$ ( $\Omega$ , after cycling) |
|-----------|---------------------------------------|--------------------------------------|
| HVO       | 287.9                                 | 26.8                                 |
| PVO       | 148.2                                 | 16.3                                 |
| PVO-Li    | 121.4                                 | 6.5                                  |
| PVO-Na    | 127.0                                 | 9.1                                  |
| PVO-K     | 134.1                                 | 12.5                                 |

**Table S5.** Comparison of  $Zn^{2+}$  diffusion coefficients ( $D_{Zn}$ ) with other pre-intercalated  $V_2O_5$  cathodes for aqueous zinc-ion batteries.

| Cathode                                        | $D_{Zn}$ ( $cm^2 s^{-1}$ )                       |                                                  | Ref.      |
|------------------------------------------------|--------------------------------------------------|--------------------------------------------------|-----------|
|                                                | Discharge process                                | Charge process                                   |           |
| PVO-Li                                         | $9.56 \times 10^{-10} \sim 6.00 \times 10^{-9}$  | $1.04 \times 10^{-9} \sim 4.43 \times 10^{-9}$   | This work |
| $Li_xV_2O_5 \cdot nH_2O$                       | $9.5 \times 10^{-9} \sim 3.37 \times 10^{-8}$    | $3.3 \times 10^{-9} \sim 2.36 \times 10^{-8}$    | 1         |
| PANI- $V_2O_5$                                 | $1.38 \times 10^{-11} \sim 1.02 \times 10^{-10}$ | $6.81 \times 10^{-12} \sim 1.70 \times 10^{-10}$ | 2         |
| PANI- $V_2O_5$                                 | $1.0 \times 10^{-7} \sim 3.4 \times 10^{-7}$     | $1.5 \times 10^{-7} \sim 4.3 \times 10^{-7}$     | 3         |
| $Zn_{0.25}V_2O_5 \cdot nH_2O$                  | $\sim 10^{-9} \sim 10^{-10}$                     |                                                  | 4         |
| PEDOT- $V_2O_5$                                | $10^{-6.4} \sim 10^{-7.6}$                       |                                                  | 5         |
| $Mg_{0.19}V_2O_5 \cdot 0.99H_2O$               | $10^{-8.0} \sim 10^{-9.5}$                       |                                                  | 6         |
| $(TMA_{0.77}Zn_{0.23})V_8O_{20} \cdot 3.8H_2O$ | $1.2 \times 10^{-9} \sim 3.6 \times 10^{-11}$    |                                                  | 7         |

Note: PANI, polyaniline; PEDOT, poly(3,4-ethylene-dioxythiophene); TMA, tetramethylammonium.

## References

- 1 Y. Yang, Y. Tang, G. Fang, L. Shan, J. Guo, W. Zhang, C. Wang, L. Wang, J. Zhou and S. Liang, *Energy Environ. Sci.*, 2018, **11**, 3157-3162.
- 2 S. Liu, H. Zhu, B. Zhang, G. Li, H. Zhu, Y. Ren, H. Geng, Y. Yang, Q. Liu and C. C. Li, *Adv. Mater.*, 2020, **32**, 2001113.
- 3 S. Chen, K. Li, K. S. Hui and J. Zhang, *Adv. Funct. Mater.*, 2020, **30**, 2003890.
- 4 D. Kundu, B. D. Adams, V. Duffort, S. H. Vajargah and L. F. Nazar, *Nat. Energy*, 2016, **1**, 16119.
- 5 Y. Liu, T. Wang, Y. Sun, M. Zhang, G. Gao, J. Yang and K. Cai, *Chem. Eng. J.*, 2024, **484**, 149501.
- 6 W. Zhou, J. Chen, M. Chen, A. Wang, A. Huang, X. Xu, J. Xu and C. Wong, *J. Mater. Chem. A*, 2020, **8**, 8397-8409.
- 7 F. Zhang, X. Sun, M. Du, X. Zhang, W. Dong, Y. Sang, J. Wang, Y. Li, H. Liu and S. Wang, *Energy Environ. Mater.*, 2021, **4**, 620-630.
